# Supplementary material for: Cell-Free Culture Supernatant of Lactobacillus acidophilus AG01 and Bifidobacterium animalis subsp. lactis AG02 Reduces the Pathogenicity of NetB-Positive Clostridium perfringens in a Chicken Intestinal Epithelial Cell Line
Source: MDPI journal article supplement (doi:10.3390/microorganisms12040839), 2024-04-22
Supplement: s1 [file s1]

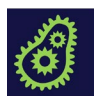

## Article

# Cell-Free Culture Supernatant of *Lactobacillus acidophilus* AG01 and *Bifidobacterium animalis* subsp. *lactis* AG02 Reduces the Pathogenicity of NetB-Positive *Clostridium perfringens* in a Chicken Intestinal Epithelial Cell Line

Darshana Kadekar <sup>1</sup>, Andreea Cornelia Udrea <sup>1</sup>, Steffen Yde Bak <sup>2</sup>, Niels Christensen <sup>2</sup>, Kirsty Gibbs <sup>3</sup>, Chong Shen <sup>1,\*</sup> and Marion Bernardeau <sup>3,4,\*</sup>

<sup>1</sup> Gut Immunology Lab, R&D, Health & Biosciences, IFF, 8220 Brabrand, Denmark; darsh311@gmail.com (D.K.); andreea.cornelia.udrea@iff.com (A.C.U.)

<sup>2</sup> IFF Advanced Analysis, R&D, ET, IFF, 8220 Brabrand, Denmark; steffen.yde.bak@iff.com (S.Y.B.); niels.christensen@iff.com (N.C.)

<sup>3</sup> Danisco Animal Nutrition, IFF, 2342 BH Oegstgeest, The Netherlands; kirsty.gibbs@iff.com

<sup>4</sup> Agro-Food Department, Normandy University, UNICAEN, ABTE, 14000 Caen, France

\* Correspondence: chong.shen@iff.com (C.S.); marion.bernardeau@iff.com (M.B.)

## Supplementary materials

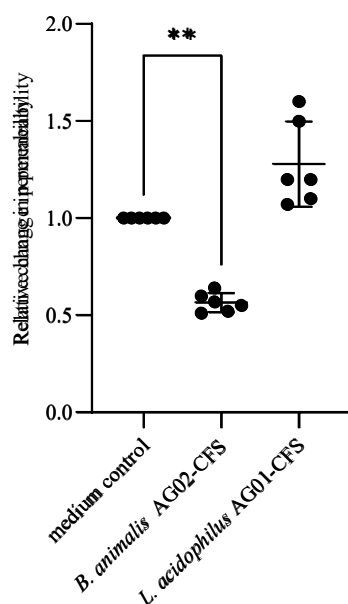

**Figure S1.** Effect of CFS from two probiotic strains *L. acidophilus* AG01 and *B. animalis* AG02 (30 µl/ml) on CHIC-8E11 cell permeability.

Figure showing the effect of probiotic cell-free supernatants harvested from *L. acidophilus* AG01 and *B. animalis* AG02, on CHIC-8E11 permeability. Permeability is measured using the Fluorescein Isothiocyanate-dextran (FITC-D) permeability assay and is expressed as a percentage of the amount (µg) of FD4 in the basolateral compartment of cell culture inserts relative to that in the apical compartment after overnight incubation at 37°C in an atmosphere of 5% CO<sub>2</sub>. The reduction in permeability (%) was calculated relative to the medium control (without probiotic CFS pre-treatment). Experiments were performed

three times with 6 replicates. Values represent means  $\pm$  SD. \*, statistically significant at  $P < 0.05$ ; \*\*, statistically significant at  $P < 0.01$ ; n.s., non-significant at  $P < 0.05$ .

**Table S1.** Proteins, TaqMan ID numbers and expression results for CHIC 8E11 cell line verification.

| Proteins (Gene Name) | Major Cell Source                                                                                                             | TaqMan ID No. | Expression (±) |        |         |
|----------------------|-------------------------------------------------------------------------------------------------------------------------------|---------------|----------------|--------|---------|
|                      |                                                                                                                               |               | CHIC 8E-11     | Caco-2 | IPEC-J2 |
| Chicken              |                                                                                                                               |               |                |        |         |
| IL-10                | Myeloid and lymphoid cells, granulocytes                                                                                      | Gg03358689_m1 | –              | –      | –       |
| IL-8                 | Macrophage, epithelial and endothelial cells, smooth muscle cells                                                             | Gg03348119_m1 | +              | –      | –       |
| MUC2                 | Goblet cells, epithelial cells                                                                                                | Gg03326003_m1 | –              | –      | –       |
| pIgR                 | epithelial cells                                                                                                              | Gg03359883_m1 | –              | –      | –       |
| CCL5 (RANTES)        | T cells, endothelial cells, epithelial cells, parenchymal cells                                                               | Gg03360168_m1 | –              | –      | –       |
| CXCL10 (IP-10)       | leukocytes, activated neutrophils, eosinophils, monocytes, epithelial cells, endothelial cells, fibroblasts and keratinocytes | Gg03312108_m1 | –              | –      | –       |
| IL-1 beta            | Myeloid cells, neutrophils, keratinocytes, epithelial and endothelial cells, lymphocytes, smooth muscle cells and fibroblasts | Gg03347154_g1 | –              | –      | –       |
| CDX1                 | Epithelial cell                                                                                                               | Gg03338368_m1 | +              | –      | –       |
| CDX4                 | Epithelial cell                                                                                                               | Gg03337886_m1 | –              | –      | –       |
| Villin               | Enterocyte                                                                                                                    | Gg03326729_m1 | –              | –      | –       |
| Sox-9                | Intestinal stem cells, Paneth cell                                                                                            | Gg03364395_m1 | +              | –      | –       |
| Keratin 5            | Epithelial cell                                                                                                               | Gg03345473_m1 | –              | –      | –       |
| Keratin 14           | Epithelial cell                                                                                                               | Gg03358651_m1 | –              | –      | –       |
| Vimentin             | Mesenchymal cells                                                                                                             | Gg03360310_m1 | +              | –      | –       |
| Desmin               | Mesenchymal cells                                                                                                             | Gg03330588_m1 | +              | –      | –       |
| CDH3                 | Epithelial cell                                                                                                               | Gg03332134_g1 | +              | –      | –       |
| Lgr-5                | Intestinal stem cell                                                                                                          | Gg03327051_m1 | +              | –      | –       |
| Pcna                 | Multi-, for cell proliferation                                                                                                | Gg03363697_m1 | +              | –      | –       |
| ACTA2                | Fibroblast                                                                                                                    | Gg03352404_m1 | +              | –      | –       |
| Olfm4                | Intestinal stem cell                                                                                                          | Gg03359583_m1 | –              | –      | –       |
| Znrf3                | Intestinal stem cell                                                                                                          | Gg07167606_s1 | –              | –      | –       |
| HopX                 | Intestinal stem cell                                                                                                          | Gg03337545_m1 | +              | –      | –       |
| TNF-α                | Myeloid, Lymphoid, epithelial cells                                                                                           | Gg03364359_m1 | –              | –      | –       |
| iNOS                 | T cells, macrophages, Dendritic cell and epithelial cells                                                                     | Gg03347749_m1 | –              | –      | –       |
| IL-12B               | Myeloid cells                                                                                                                 | Gg03349677_m1 | –              | –      | –       |
| TBP                  | Multi-, housekeeping                                                                                                          | Gg03366486_m1 | +              | –      | –       |
| POLR2B               | Multi-, housekeeping                                                                                                          | Gg03337168_m1 | +              | –      | –       |
| Beta-Actin           | Multi-, housekeeping                                                                                                          | Gg03815934_s1 | +              | –      | –       |
| Human                |                                                                                                                               |               |                |        |         |
| MUC2                 | Goblet cells, epithelial cells                                                                                                | Hs03005103_g1 | –              | +      | –       |
| CLDN4                | Epithelial cells                                                                                                              | Hs00976831_s1 | –              | +      | –       |
| GUSB                 | Multi-, housekeeping                                                                                                          | Hs99999908_m1 | –              | +      | –       |
| Pig                  |                                                                                                                               |               |                |        |         |
| CLDN4                | Epithelial cells                                                                                                              | Ss03375006_u1 | –              | –      | +       |
| CD14                 | Myeloid cells                                                                                                                 | Ss03818718_s1 | –              | –      | –       |
| HPRT                 | Multi-, housekeeping                                                                                                          | Ss03818718_s1 | –              | –      | +       |

+,  $\Delta CT \leq 25$  cycles; –,  $\Delta CT > 25$  cycles or not detectable.

Description of data: Table listing the selected proteins, associated TaqMan ID numbers and cell expression results (+/–) in CHIC-8E11 cells compared with Caco-2 and IPEC-

J2 cells, as part of the pre-experimental confirmation of IPEC-J2 cell line as a chicken cell line of intestinal epithelial origin.
